# Supplementary material for: Simulation-based survey of TMEM16 family reveals that robust lipid scrambling requires an open groove
Source: eLife. 2025 Aug 6;14:RP105111. doi: 10.7554/eLife.105111 (PMC12327946; doi:10.7554/eLife.105111)
Supplement: Figure 1—source data 1. [file elife-105111-fig1-data1.xlsx]

## Sheet: Sheet1
	PDB ID	State	Lipid count (mean ± std)
nhTMEM16	4WIS	Open	2.8±1.3
	6QMA	Intermediate	1.1±0.9
	6QM4	Closed	0.6±0.6
afTMEM16	7RXG	Open	2.2±1.1
	7RXB	Closed	0.3±0.5
TMEM16K	5OC9	Open	1.9±1.1
	6R7X	Closed	0.4±0.6
TMEM16F	8B8J	Open(F518H mutant)	2.0±1.2
	6QP6*	Open	2.3±1.1
	6QP6	Closed	0.0±0.0
TMEM16A	5OYB*	Ion conductive	1.0±0.9
	5OYB	Closed	0.5±0.6
